# Supplementary material for: Direct visualization of radiation-induced transformations at alkali halide–air interfaces
Source: Springer Nature journal article supplement (doi:10.1038/s42004-021-00486-2), 2021-04-08
Supplement: 42004_2021_486_MOESM2_ESM.pdf [file 42004_2021_486_MOESM2_ESM.pdf]

## **Description of Additional Supplementary Files**

File Name: Supplementary Movie 1-3

Description: Time lapse AFM topography, amplitude, and phase respectively of KBr irradiated in 0.1 % RH air over 12 hours as shown in Figs. 3a-b, 4a.

File Name: Supplementary Movie 4-6.

Description: Time lapse AFM topography, amplitude, and phase respectively of KBr irradiated in 60 % RH Ar/1% air over 8 hours as shown in Figs. 3c-d, 4b.
